# Supplementary material
Source: PubMed Central journal article supplement (PMC2788671)

## Supporting Information

### **Malaria-Infected Mice Live Until At Least Day 30 After A New Monomeric Trioxane Combined with Mefloquine Are Administered Together In A Single Low Oral Dose.**

Lauren E. Woodard,<sup>a</sup> Wonsuk Chang,<sup>a</sup> Xiaochun Chen,<sup>b</sup> Jun O. Liu,<sup>b</sup> Theresa A. Shapiro,<sup>c,d</sup> and Gary H. Posner,<sup>\*a,d</sup>

*<sup>a</sup>Department of Chemistry, School of Arts and Sciences, The Johns Hopkins University, 3400 North Charles Street, Baltimore, Maryland 21218-2685; <sup>b</sup>Department of Pharmacology and Oncology, School of Medicine, The Johns Hopkins University, Baltimore, Maryland 21205; <sup>c</sup>Division of Clinical Pharmacology, Department of Medicine, School of Medicine, The Johns Hopkins University, Baltimore, Maryland 21205; <sup>d</sup>The Johns Hopkins Malaria Research Institute, Bloomberg School of Public Health, Baltimore, Maryland 21205*

#### Contents of SI:

|                                                                  |            |
|------------------------------------------------------------------|------------|
| <sup>1</sup> H and <sup>13</sup> C spectra of compound <b>3</b>  | Page S2-S3 |
| <sup>1</sup> H and <sup>13</sup> C spectra of compound <b>4a</b> | Page S4-S5 |
| <sup>1</sup> H and <sup>13</sup> C spectra of compound <b>4b</b> | Page S6-S7 |



175.77  
163.24  
160.80  
134.27  
129.82  
129.74  
115.32  
115.11  
103.40  
103.32  
102.94  
100.83  
100.80  
99.96  
99.36  
96.98  
88.63  
88.38  
81.16  
81.05  
77.32  
77.00  
76.69  
76.42  
73.69  
52.53  
52.35  
44.68  
44.49  
44.31  
43.28  
37.42  
37.20  
36.52  
36.47  
34.47  
34.43  
33.29  
32.87  
30.15  
29.93  
26.20  
26.04  
24.85  
24.76  
24.63  
24.50  
20.18

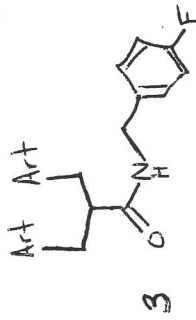

Current Data Parameters  
NAME WCH\_B64\_75\_C13  
EXPNO 1  
PROCNO 1

F2 - Acquisition Parameters

Date\_ 20060627  
Time 15.56  
INSTRUM spect  
PROBHD 5 mm PABBO BB-  
PULPROG zgpg30  
TD 65336  
SOLVENT CDC13  
NS 433  
DS 4  
SWH 23980.814 Hz  
AQ 0.365918 Hz  
RG 1.3664756 sec  
EG 45.3  
DW 20.850 usec  
DE 6.00 usec  
TE 296.0 K  
D1 2.0000000 sec  
d11 0.0300000 sec  
DELTA 1.8999998 sec  
TDO 12

==== CHANNEL f1 =====  
NUC1 13C  
P1 8.25 usec  
PL1 -3.00 dB  
SFO1 100.6228298 MHz

==== CHANNEL f2 =====  
CPDPRG2 waltz16  
NUC2 1H  
PCPD2 80.00 usec  
PL2 -4.00 dB  
PL12 14.00 dB  
PL13 14.00 dB  
SFO2 400.1316005 MHz

F2 - Processing parameters

SI 32768  
SF 100.6127726 MHz  
WDW nc  
SSE 0  
LB 0.00 Hz  
GB 0  
PC 1.40

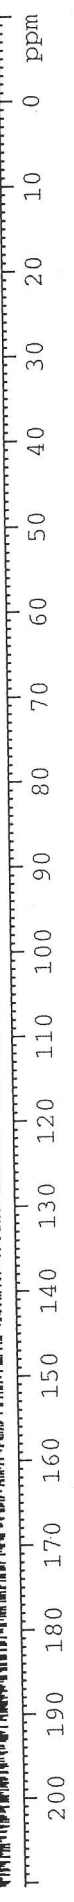

7.276  
7.271  
7.263  
7.256  
7.247  
7.241  
7.203  
7.018  
7.002  
6.997  
6.980  
5.267  
4.410  
4.400  
4.396  
4.388  
2.727  
2.708  
2.456  
2.436  
2.352  
2.333  
2.328  
2.316  
2.293  
2.018  
1.988  
1.981  
1.864  
1.838  
1.826  
1.819  
1.809  
1.792  
1.783  
1.662  
1.637  
1.628  
1.578  
1.561  
1.546  
1.418  
1.389  
1.373  
1.356  
1.347  
1.273  
1.258  
1.246  
1.230  
0.958  
0.943  
0.886  
0.867  
0.850

Current Data Parameters  
NAME LEW2-113  
EXPNO 1  
PROCNO 1

F2 - Acquisition Parameters

Date\_ 20080813  
Time\_ 9.22  
INSTRUM spect  
PROBHD 5 mm PABBO BB-  
PULPROG zg30  
TD 65536  
SOLVENT CDCl3  
NS 32  
DS Z  
SWH 8278.146 Hz  
FIDRES 0.126314 Hz  
AQ 3.9584243 sec  
RG 456.1  
DW 60.400 usec  
DE 6.00 usec  
TE 295.8 K  
D1 1.00000000 sec  
TDO 1

===== CHANNEL f1 =====  
NUC1 1H  
P1 8.60 usec  
PL1 -4.00 dB  
SFOL 400.1324710 MHz

F2 - Processing parameters

SF 400.1300108 MHz  
WDW no  
SSB 0  
LB 0.00 Hz  
GB 0  
PC 1.00

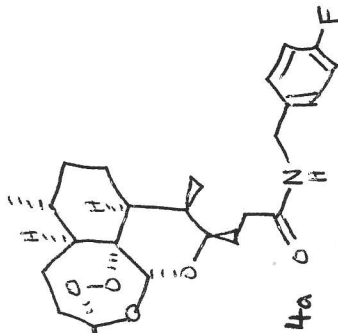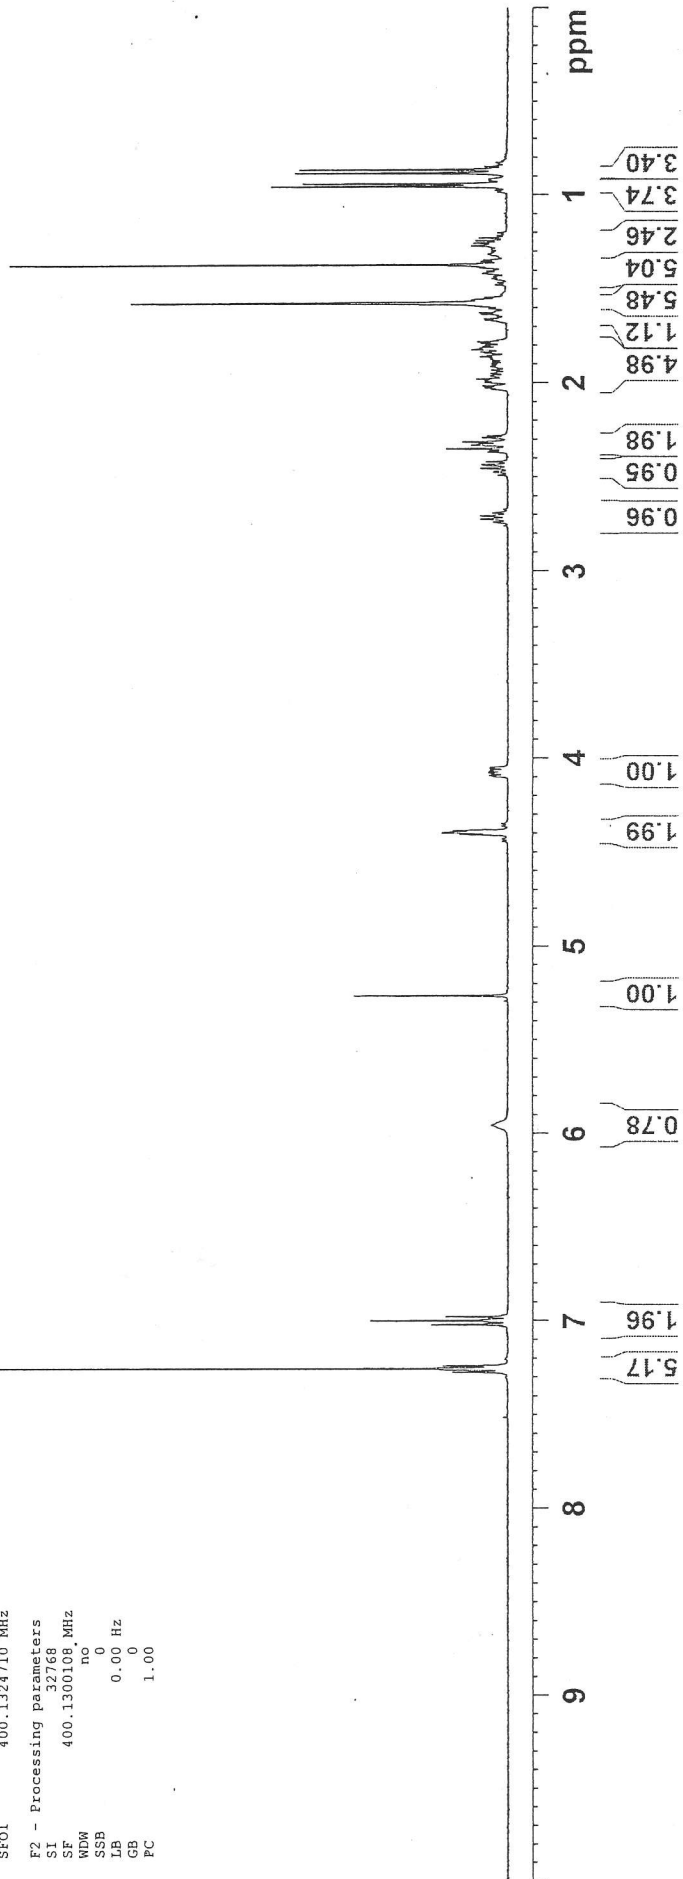

172.97  
163.40  
160.96  
134.27  
129.58  
129.50  
115.52  
115.31  
103.28  
88.91  
81.14  
77.32  
77.00  
76.68  
75.75  
52.44  
44.45  
43.01  
37.43  
36.58  
34.64  
34.48  
30.22  
26.11  
25.15  
24.89  
24.68  
20.12  
13.00

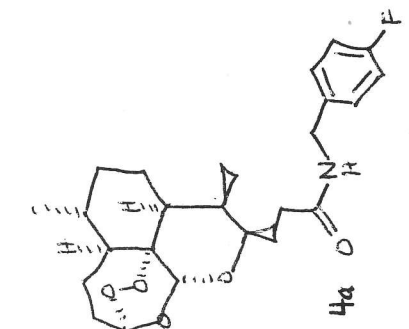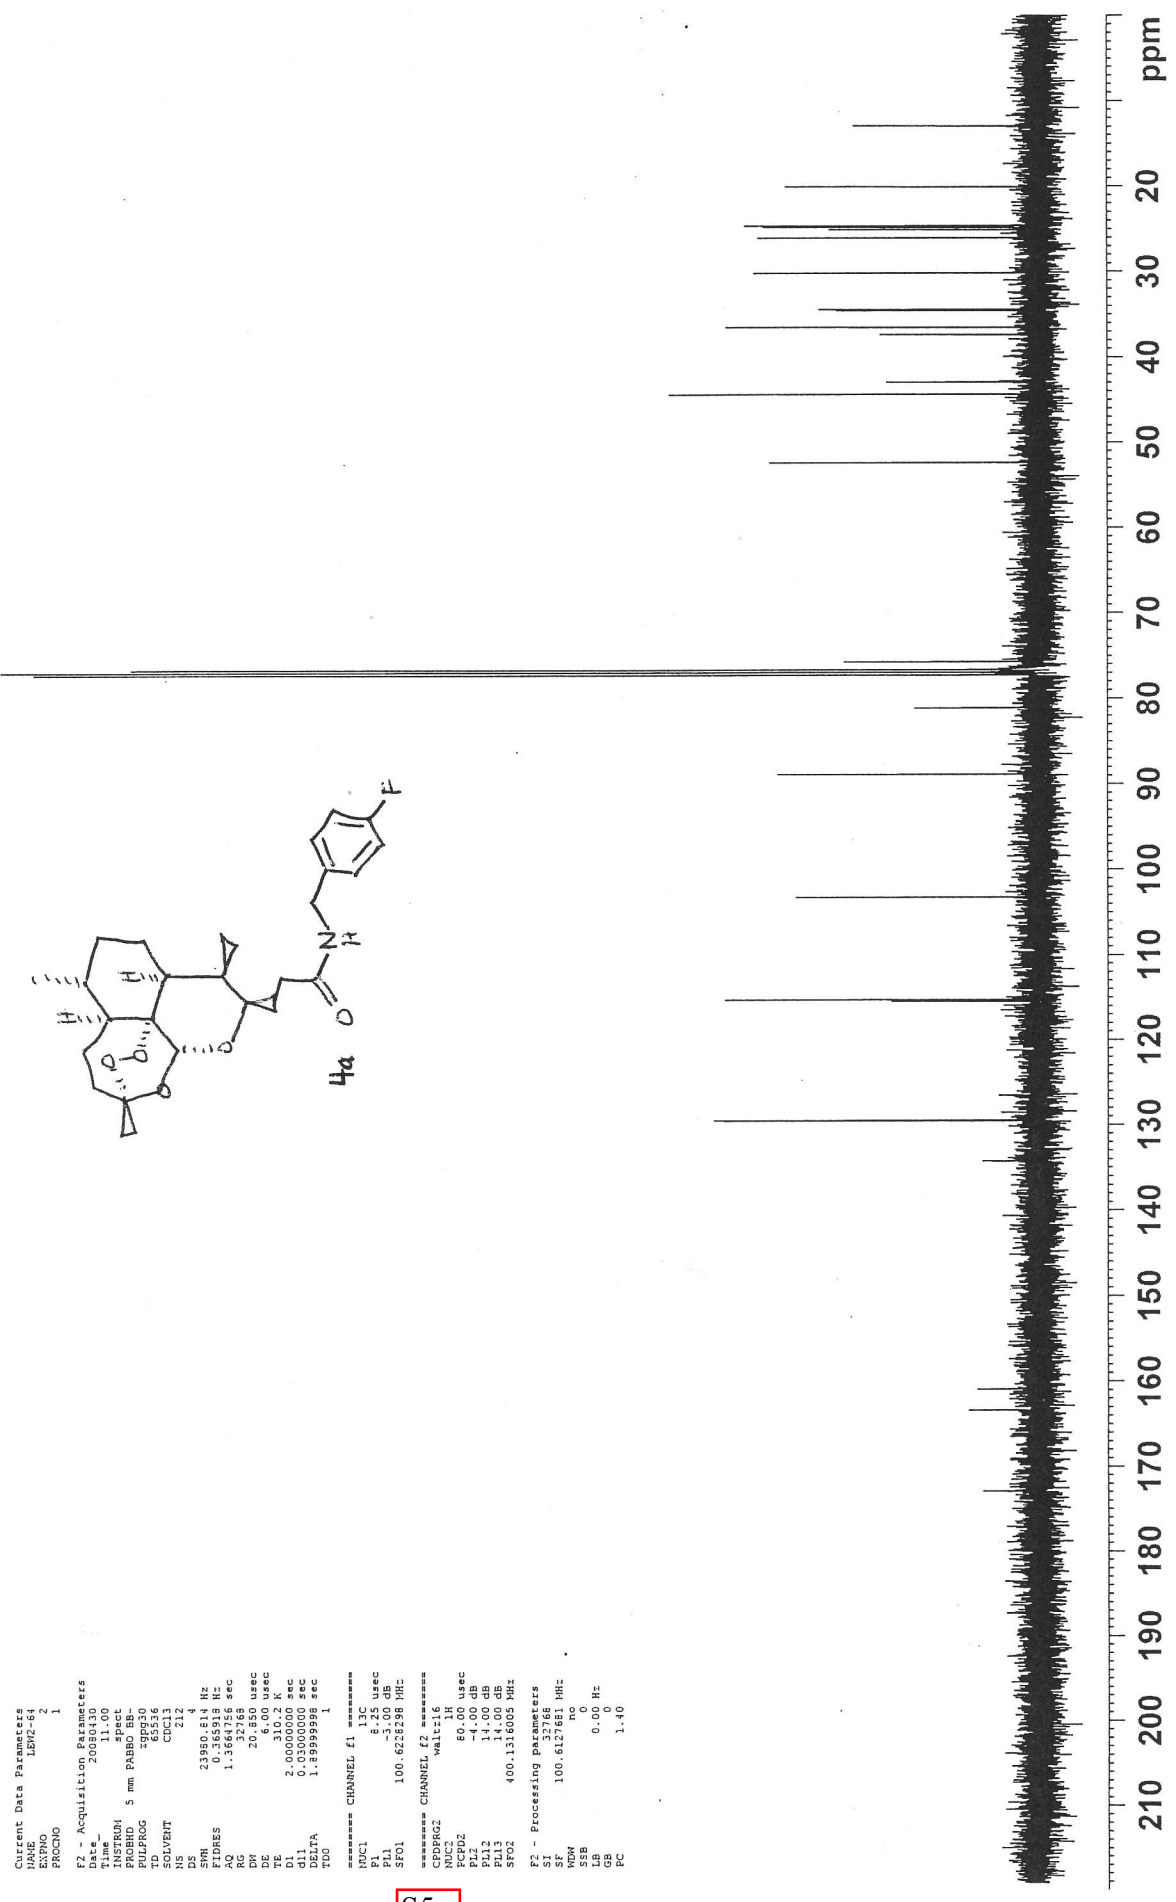

```

Current Data Parameters
Name      LEW2-61
Date_     2010100
Time      17.00
PROCNO    1
=====
F2 - Acquisition Parameters
Date_     2010100
Time      17.00
INSTRUM   spect
PROBHD    5 mm PABBO BB-
PULPROG   zgpg30
SOLVENT   CDCl3
NS         212
DS         4
SWH        23968.51 Hz
FIDRES    0.364593 Hz
AQ         1.3366756 sec
RG         32768
RR         20.860 usec
DE         0.100 usec
TE         310.2 K
D1         2.00000000 sec
d11        0.03000000 sec
DELTA     1.00000000 sec
TD0       1.00000000
===== CHANNEL f1 =====
NUC1      13C
P1         8.25 usec
PL1        -3.00 dB
SFO1      100.626289 MHz
===== CHANNEL f2 =====
CPDPRG2   waltz16
NUC2      1H
P2         80.00 usec
PL2        14.00 dB
SFO2      400.1316005 MHz
=====
F2 - Processing parameters
SI         32768
SF         100.6127661 MHz
WDW        EM
SSB        0
LB         0.00 Hz
GB         0
PC         1.40
  
```



171.33  
 157.89  
 134.17  
 121.67  
 121.59  
 115.44  
 115.22  
 103.42  
 88.79  
 81.08  
 77.30  
 76.98  
 76.66  
 76.12  
 52.30  
 44.31  
 37.34  
 36.42  
 35.62  
 34.32  
 30.85  
 30.13  
 25.98  
 24.82  
 24.55  
 20.09  
 13.04

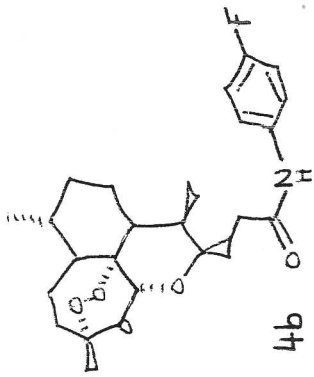

```

Current Data Parameters
NAME      LHM2-114
EXPNO     2
PROCNO    1
F2 - Acquisition Parameters
Date_     20080814
Time      14.16
INSTRUM   spect
PROBHD    5 mm PABBO-
PULPROG   zgpg30
TD         65536
SOLVENT   CDCl3
DS         32
SWH        23980.814 Hz
FIDRES     0.365918 Hz
AQ         1.336728 sec
RG          3278
DM         20.850 usec
DE         6.00 usec
TE         296.5 K
NUC1       0.01000000 sec
d11        0.01000000 sec
DELTA     1.8999999 sec
TD0        1
===== CHANNEL f1 =====
NUC1       13C
P1         8.25 usec
PL1        -1.90 dB
SFO1       100.622828 MHz
===== CHANNEL f2 =====
CPDPRG2   waltz16
NUC2
PCPD2     80.00 usec
PL2       -4.00 dB
PL12      14.00 dB
PL13      14.00 dB
SFO2       400.1316005 MHz
F2 - Processing Parameters
SI         32768
SF         100.6127776 MHz
WDW        no
SSB        0
GB         0
LB         0
PC         1.40
  
```

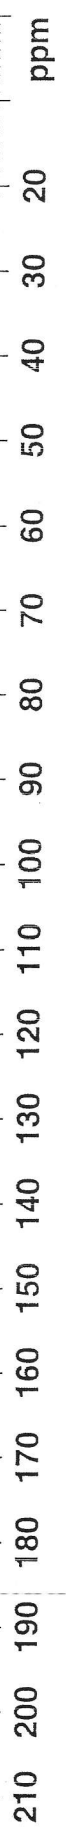

Supplement: NIHMS132635-supplement-1_si_001.pdf [file NIHMS132635-supplement-1_si_001.pdf]
